# Supplementary material
Source: PubMed Central journal article supplement (PMC7206931)
Supplement: NEJMoa2007621_appendix.pdf [file NEJMoa2007621_appendix.pdf]

## Supplementary Appendix

This appendix has been provided by the authors to give readers additional information about their work.

Supplement to: Mehra MR, Desai SS, Kuy S, Henry TD, Patel AN. Cardiovascular disease, drug therapy, and mortality in Covid-19. *N Engl J Med*. DOI: 10.1056/NEJMoa2007621

## Table of Contents

### SUPPLEMENTARY FIGURES

|                                                       |   |
|-------------------------------------------------------|---|
| Figure S1. Association Between Age and Mortality..... | 3 |
|-------------------------------------------------------|---|

### SUPPLEMENTARY TABLES

|                                                                                                    |    |
|----------------------------------------------------------------------------------------------------|----|
| Table S1. Study Sample by Continent, Country, and Number of Hospitals.....                         | 4  |
| Table S2. Summary Data by Continent.....                                                           | 5  |
| Table S3. Summary Data for High Income Countries (HIC) and Low-Middle Income (LMIC) Countries..... | 6  |
| Table S4. Multivariable Logistic Regression Analysis by Continent.....                             | 7  |
| Table S5. Multivariable Logistic Regression Analysis for Low-Middle Income Countries.....          | 8  |
| Table S6. Age- and Sex-Adjusted Multivariable Logistic Regression Analysis.....                    | 9  |
| Table S7. Tipping Point Analysis to Estimate the Effect of Unmeasured Confounders.....             | 10 |
| Table S8. Subgroup Analyses (Hypertension and Hyperlipidemia).....                                 | 11 |

## SUPPLEMENTARY FIGURES

Figure S1. Association Between Age and Mortality

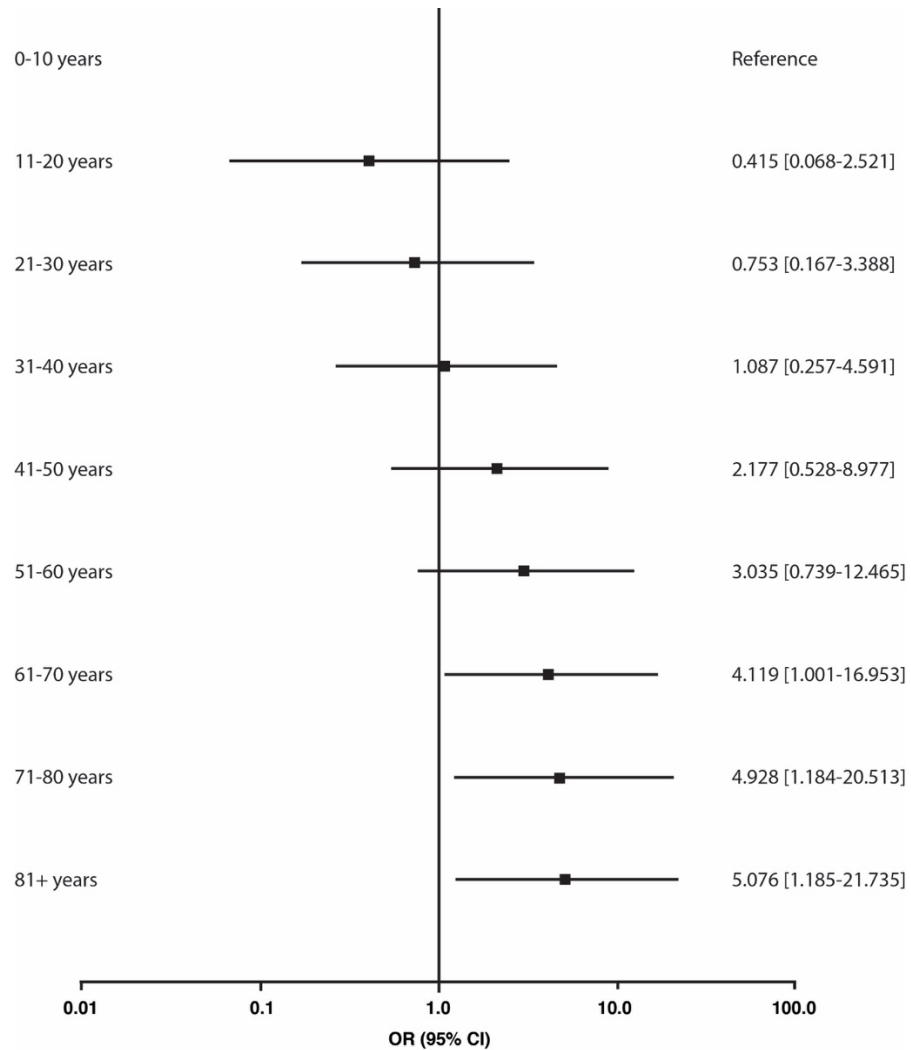

Age is depicted in deciles; OR (95% CI) refers to odds ratios with the corresponding 95% confidence intervals. The 95% confidence intervals have not been adjusted for multiple testing and should not be used to infer definitive effects.

## SUPPLEMENTARY TABLES

**Table S1. Study sample by continent, country, and number of hospitals**

| <b>Continent</b> | <b>Country</b> | <b>Number of Hospitals</b> | <b>Number of Patients</b> |
|------------------|----------------|----------------------------|---------------------------|
| North America    | United States  | 121                        | 1,499                     |
| North America    | Canada         | 4                          | 37                        |
| Europe           | Spain          | 7                          | 1,793                     |
| Europe           | Italy          | 8                          | 2,602                     |
| Europe           | Germany        | 5                          | 201                       |
| Europe           | France         | 5                          | 107                       |
| Europe           | United Kingdom | 7                          | 706                       |
| Europe           | Turkey         | 3                          | 346                       |
| Asia             | China          | 7                          | 1,507                     |
| Asia             | South Korea    | 1                          | 88                        |
| Asia             | Japan          | 1                          | 24                        |

**Table S2. Summary Data by Continent**

|                                 | <b>North America</b> | <b>Europe</b> | <b>Asia</b>   |
|---------------------------------|----------------------|---------------|---------------|
| <b>N</b>                        | 1,536                | 5,755         | 1,619         |
| <b>Age</b>                      | 49.6 +/- 16.7        | 49.0 +/- 16.7 | 49.2 +/- 16.3 |
| <b>Female</b>                   | 609 (39.6)           | 2,322 (40.3)  | 640 (39.5)    |
| <b>CAD</b>                      | 209 (13.6)           | 629 (10.9)    | 172 (10.6)    |
| <b>CHF</b>                      | 45 (2.9)             | 116 (2.0)     | 28 (1.7)      |
| <b>Arrhythmia</b>               | 57 (3.7)             | 188 (3.3)     | 59 (3.6)      |
| <b>DM</b>                       | 218 (14.2)           | 826 (14.4)    | 228 (14.1)    |
| <b>HTN</b>                      | 419 (27.3)           | 1,495 (26.0)  | 432 (26.7)    |
| <b>Hyperlipidemia</b>           | 501 (32.6)           | 1,733 (30.1)  | 481 (29.7)    |
| <b>COPD</b>                     | 51 (3.3)             | 140 (2.4)     | 34 (2.1)      |
| <b>Current Smoker</b>           | 86 (5.6)             | 309 (5.4)     | 96 (5.9)      |
| <b>Former Smoker</b>            | 257 (16.7)           | 954 (16.6)    | 282 (17.4)    |
| <b>Immunocompromised Status</b> | 48 (3.1)             | 162 (2.8)     | 39 (2.4)      |
| <b>ACEI</b>                     | 143 (9.3)            | 494 (8.6)     | 133 (8.2)     |
| <b>ARB</b>                      | 97 (6.3)             | 356 (6.2)     | 103 (6.4)     |
| <b>Beta Blocker</b>             | 97 (6.3)             | 329 (5.7)     | 99 (6.1)      |
| <b>Antiplatelet</b>             | 48 (3.1)             | 190 (3.3)     | 57 (3.5)      |
| <b>Statin</b>                   | 163 (10.6)           | 539 (9.4)     | 158 (9.8)     |
| <b>Insulin</b>                  | 62 (4.0)             | 186 (3.2)     | 54 (3.3)      |
| <b>Other hypoglycemics</b>      | 146 (9.5)            | 551 (9.6)     | 154 (9.5)     |
| <b>Mortality</b>                | 88 (5.7)             | 351 (6.1)     | 76 (4.7)      |

**Table S3. Summary Data for High Income Countries (HIC) and Low-Middle Income (LMIC) Countries**

| <b>Variable</b>     | <b>HIC</b>    | <b>LMIC</b>   |
|---------------------|---------------|---------------|
| Age (Years)         | 49.2 +/- 16.7 | 48.9 +/- 16.3 |
| Female              | 40.3%         | 39.1%         |
| CAD                 | 11.5%         | 10.4%         |
| CHF                 | 2.2%          | 1.7%          |
| Arrhythmia          | 3.4%          | 3.5%          |
| DM                  | 14.5%         | 13.7%         |
| HTN                 | 26.2%         | 27.0%         |
| Hyperlipidemia      | 30.7%         | 29.3%         |
| COPD                | 2.6%          | 2.2%          |
| Current             | 5.3%          | 6.1%          |
| Former              | 16.7%         | 16.9%         |
| Immunocompromised   | 2.8%          | 2.8%          |
| ACEI                | 8.6%          | 9.0%          |
| ARB                 | 6.2%          | 6.3%          |
| Beta Blocker        | 5.8%          | 6.4%          |
| Antiplatelet        | 3.2%          | 3.7%          |
| Statin              | 9.7%          | 9.6%          |
| Insulin             | 3.4%          | 3.2%          |
| Other hypoglycemics | 9.6%          | 9.3%          |
| Mortality           | 6.3%          | 4.8%          |

**HIC and LMIC were defined based on WHO classifications**  
[\(https://www.who.int/healthinfo/global\\_burden\\_disease/definition\\_regions/en/\)](https://www.who.int/healthinfo/global_burden_disease/definition_regions/en/)

**Table S4. Multivariable Logistic Regression Analysis by Continent****a) Multivariable logistic regression analysis for in-hospital mortality: North America**

| <b>Variable</b>  | <b>Odds Ratio</b> | <b>95% CI (Low)</b> | <b>95% CI (High)</b> |
|------------------|-------------------|---------------------|----------------------|
| Age              | 1.026             | 0.966               | 1.089                |
| Age <sup>2</sup> | 1.000             | 0.999               | 1.000                |
| Female           | 0.761             | 0.507               | 1.141                |
| CAD              | 2.477             | 1.465               | 4.188                |
| CHF              | 3.117             | 1.432               | 6.784                |
| Arrhythmia       | 2.887             | 1.419               | 5.870                |
| COPD             | 2.203             | 1.015               | 4.780                |
| Current smoker   | 1.657             | 0.833               | 3.299                |
| ACE inhibitor    | 0.231             | 0.072               | 0.743                |
| Statin           | 0.261             | 0.110               | 0.618                |

**b) Multivariable logistic regression analysis for in-hospital mortality: Europe**

| <b>Variable</b>  | <b>Odds Ratio</b> | <b>95% CI (Low)</b> | <b>95% CI (High)</b> |
|------------------|-------------------|---------------------|----------------------|
| Age              | 1.094             | 1.047               | 1.142                |
| Age <sup>2</sup> | 0.999             | 0.999               | 1.000                |
| Female           | 0.775             | 0.612               | 0.982                |
| CAD              | 2.573             | 1.835               | 3.608                |
| CHF              | 1.897             | 1.044               | 3.446                |
| Arrhythmia       | 1.307             | 0.743               | 2.299                |
| COPD             | 3.373             | 2.048               | 5.555                |
| Current smoker   | 1.728             | 1.142               | 2.614                |
| ACE inhibitor    | 0.335             | 0.182               | 0.618                |
| Statin           | 0.372             | 0.230               | 0.601                |

**c) Multivariable logistic regression analysis for in-hospital mortality: Asia**

| <b>Variable</b>  | <b>Odds Ratio</b> | <b>95% CI (Low)</b> | <b>95% CI (High)</b> |
|------------------|-------------------|---------------------|----------------------|
| Age              | 1.124             | 1.019               | 1.239                |
| Age <sup>2</sup> | 0.999             | 0.998               | 1.000                |
| Female           | 0.765             | 0.475               | 1.232                |
| CAD              | 2.722             | 1.387               | 5.341                |
| CHF              | 1.085             | 0.242               | 4.859                |
| Arrhythmia       | 3.121             | 1.322               | 7.371                |
| COPD             | 7.241             | 2.512               | 20.869               |
| Current smoker   | 3.961             | 2.078               | 7.55                 |
| ACE inhibitor    | 0.099             | 0.013               | 0.736                |
| Statin           | 0.169             | 0.039               | 0.739                |

The 95% confidence intervals have not been adjusted for multiple testing and should not be used to infer definitive effects.

**Table S5. Multivariable Logistic Regression Analysis for In-Hospital Mortality:  
Low-Middle Income Countries**

| Variable         | Odds Ratio | 95% CI (Low) | 95% CI (High) |
|------------------|------------|--------------|---------------|
| Age              | 1.188      | 1.051        | 1.343         |
| Age <sup>2</sup> | 0.998      | 0.997        | 1.000         |
| Female           | 1.021      | 0.615        | 1.695         |
| CAD              | 4.691      | 2.528        | 8.705         |
| CHF              | 2.665      | 0.891        | 7.966         |
| Arrhythmia       | 3.805      | 1.653        | 8.760         |
| COPD             | 3.381      | 1.226        | 9.321         |
| Current smoker   | 2.969      | 1.465        | 6.018         |
| ACE inhibitor    | 0.135      | 0.018        | 0.992         |
| Statin           | 0.145      | 0.040        | 0.517         |

The 95% confidence intervals have not been adjusted for multiple testing and should not be used to infer definitive effects.



**Table S6. Age- and Sex-Adjusted Multivariable Logistic Regression Analysis****a) Age-adjusted multivariable regression model for in-hospital mortality**

| Variable         | Odds Ratio | 95% CI (Low) | 95% CI (High) |
|------------------|------------|--------------|---------------|
| Age              | 1.069      | 1.034        | 1.105         |
| Age <sup>2</sup> | 1.000      | 0.999        | 1.000         |
| Female           | 0.793      | 0.656        | 0.959         |
| CAD              | 2.474      | 1.899        | 3.223         |
| CHF              | 2.235      | 1.455        | 3.433         |
| Arrhythmia       | 1.968      | 1.343        | 2.884         |
| COPD             | 3.193      | 2.138        | 4.768         |
| Current smoker   | 1.723      | 1.240        | 2.396         |
| ACE inhibitor    | 0.267      | 0.157        | 0.456         |
| Statin           | 0.299      | 0.197        | 0.454         |

**b) Multivariable regression model for in-hospital mortality: females**

| Variable         | Odds Ratio | 95% CI (Low) | 95% CI (High) |
|------------------|------------|--------------|---------------|
| Age              | 1.044      | 0.989        | 1.102         |
| Age <sup>2</sup> | 1.000      | 0.999        | 1.000         |
| Female           | N/A        | N/A          | N/A           |
| CAD              | 3.849      | 2.505        | 5.913         |
| CHF              | 3.103      | 1.626        | 5.920         |
| Arrhythmia       | 2.520      | 1.396        | 4.550         |
| COPD             | 4.967      | 2.618        | 9.425         |
| Current smoker   | 1.934      | 1.103        | 3.392         |
| ACE inhibitor    | 0.306      | 0.125        | 0.746         |
| Statin           | 0.320      | 0.167        | 0.616         |

**c) Multivariable regression model for in-hospital mortality: males**

| Variable         | Odds Ratio | 95% CI (Low) | 95% CI (High) |
|------------------|------------|--------------|---------------|
| Age              | 1.090      | 1.044        | 1.138         |
| Age <sup>2</sup> | 0.999      | 0.999        | 1.000         |
| Male             | N/A        | N/A          | N/A           |
| CAD              | 1.897      | 1.347        | 2.672         |
| CHF              | 1.657      | 0.903        | 3.041         |
| Arrhythmia       | 1.488      | 0.882        | 2.512         |
| COPD             | 2.630      | 1.572        | 4.403         |
| Current smoker   | 1.653      | 1.100        | 2.484         |
| ACE inhibitor    | 0.247      | 0.126        | 0.483         |
| Statin           | 0.280      | 0.161        | 0.486         |

The 95% confidence intervals have not been adjusted for multiple testing and should not be used to infer definitive effects.

**Table S7. Tipping Point Analysis for Unmeasured Confounders**

A tipping point analysis was completed to assess the effects of an unmeasured confounder on the findings of significance with ACE inhibitors or statins. An unmeasured confounder of size  $\Gamma$  was created using the lower bound of the 95% confidence interval for ACE inhibitors (0.54 – the value closest to 1) and statins (0.52). For all practical purposes, the lower bound for ACE inhibitors and statins are similar at 0.54 and 0.52, respectively, and can be treated the same for the purposes of this tipping point analysis. The threshold prevalence of the unmeasured confounder was determined for each medication as follows:

$$P(LB, \Gamma) = \frac{LB - 1}{\Gamma - 1}$$

(Where  $1 < LB \leq \Gamma$ )

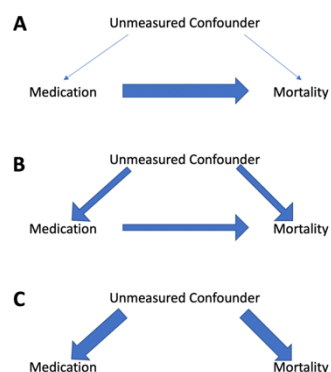

The figure below shows the sensitivity threshold for unmeasured confounders of various effect sizes as a function of the lower bound on the 95% confidence interval. Area of safety is shaded in green.

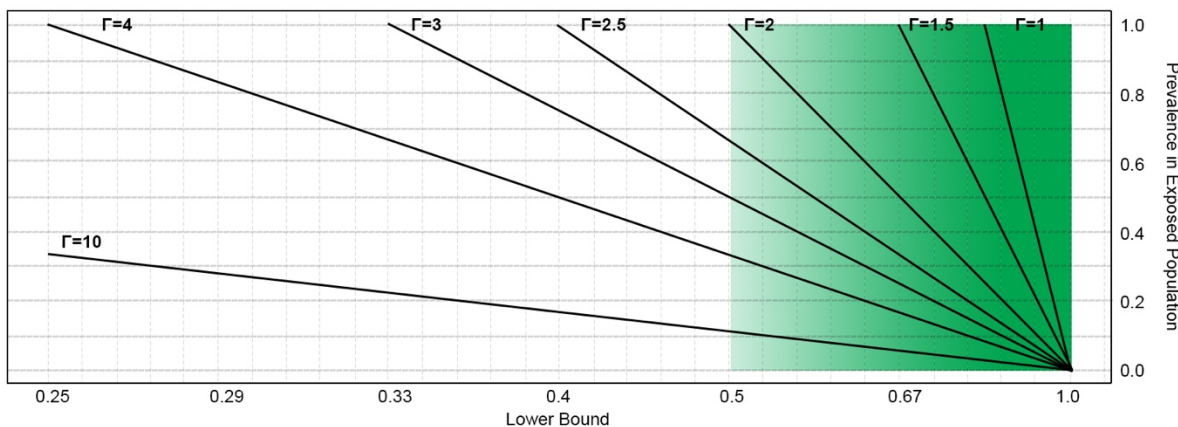

The primary analysis demonstrated that ACE inhibitors were associated with survival in COVID-19 patients; OR (95% CI): 0.33 (0.20, 0.54). The primary analysis also demonstrated that statins were associated with survival in COVID-19 patients; OR (95% CI): 0.35 (0.24, 0.52).

A hypothetical unobserved binary confounder with a prevalence of 10% in the exposed population would need to have an odds ratio of 10 to tip this analysis to non-significance at the 5% level for both ACE inhibitors and statins. Stated differently, 73 patients with ACE inhibitors would have had to survive for reasons other than the use of this medication to tip the odds ratio to non-significance – and that this would have to be due to an extremely strong effector (OR 10).

An unobserved confounder with a prevalence of 50% in the exposed population would need to have an odds ratio of 3 to tip this analysis. The presence of confounders of this effect size or prevalence are unlikely in the present study. For a comparison with the observed confounders in the study, COPD (which has an OR of 3) would need to have a prevalence of 50% in the population to lead to confounding in the analysis had it not been adjusted for in the multiple regression analysis.

### Table S8. Subgroup Analyses (Hypertension and Hyperlipidemia)

We sought to determine whether the effect of ACE inhibitors and statins noted in the overall study was also seen when confined to a limited subset of patients who might have an indication for these agents. In order to accomplish this for ACE inhibitors we examined the subset of patients in the cohort with hypertension divided into those treated with ACE inhibitors versus not. Such an analysis helps to determine the effects in patients that presumably are “more similar.” Furthermore, such an analysis may help to deal with an unresolvable problem of missing data (due to lack of coding).

We performed a similar analysis for statins and used the subset with a diagnosis of hyperlipidemia. Thus, we developed the following subgroup analyses:

- A. We evaluated the association between ACE inhibitors and mortality in patients with hypertension
- B. We evaluated the association between statins and mortality in patients with hyperlipidemia

Logistic regression analyses were performed with adjustment for age and sex. The following tables describe the findings.

- A. Subgroup analysis evaluating the association between ACE inhibitors and mortality in patients with hypertension.

| Variable      | Odds Ratio | 95% CI (Low) | 95% CI (High) |
|---------------|------------|--------------|---------------|
| Age (years)   | 1.023      | 1.011        | 1.034         |
| Female sex    | 0.690      | 0.472        | 1.010         |
| ACE inhibitor | 0.266      | 0.156        | 0.453         |

- B. Subgroup analysis evaluating the association between statins and mortality in patients with hyperlipidemia.

| Variable    | Odds Ratio | 95% CI (Low) | 95% CI (High) |
|-------------|------------|--------------|---------------|
| Age (years) | 1.022      | 1.011        | 1.034         |
| Female sex  | 0.899      | 0.657        | 1.230         |
| Statins     | 0.508      | 0.349        | 0.740         |

This subgroup analysis is consistent with the findings in the overall study.
